# Supplementary material for: Pilot Phase II Trial of Neoadjuvant Immunotherapy in Locoregionally Advanced, Resectable Cutaneous Squamous Cell Carcinoma of the Head and Neck
Source: Oxford University Press journal article supplement (doi:10.1158/1078-0432.ccr-21-0585), 2021-06-29
Supplement: supplementary+table+2.docx [file supplementary+table+2.docx]

Supplementary Table 2. Details of the surgical procedures performed

| Procedures |  | N=20 |
| --- | --- | --- |
| Primary procedures, No. (%) |  |  |
|  | Wide local excision | 12 (60) |
|  | Rhinectomy, partial | 1 (5) |
|  | Auriculectomy, partial | 2 (10) |
|  | Auriculectomy, total | 2 (10) |
|  | Mastoidectomy | 2 (10) |
|  | Lateral temporal bone resection | 2 (10) |
|  | Maxillectomy | 1 (5) |
|  | Mandibulectomy | 2 (10) |
|  | Craniectomy/skull base resection | 3 (15) |
| Nodal procedures, No. (%) |  |  |
|  | Selective neck dissection* | 13 (65) |
|  | Modified radical neck dissection | 2 (10) |
|  | Superficial parotidectomy* | 4 (20) |
|  | Total parotidectomy | 1 (5) |
| Reconstructive procedures, No. (%) |  |  |
|  | Skin graft | 6 (30) |
|  | Local flap | 3 (15) |
|  | Pedicled flap | 9 (45) |
|  | Free tissue transfer | 10 (50) |

* Includes bilateral procedures
